# Supplementary material
Source: Elsevier journal article supplement (https://www.sciencedirect.com/science/article/pii/S2255553617300095)
Supplement: mmc1 [file S2255553617300095:mmc1.docx]

#### Figura complementar 1 – Gráfico de Bland-Altman da diferença no %GC medida pela DXA e estimativa pelas equações preditivas da Tabela 3, quando o intercepto não foi estatisticamente diferente de 0,00.

| A. Equação de Dezenberg para meninos | C. Equação de Dezenberg para meninos |
| --- | --- |
| 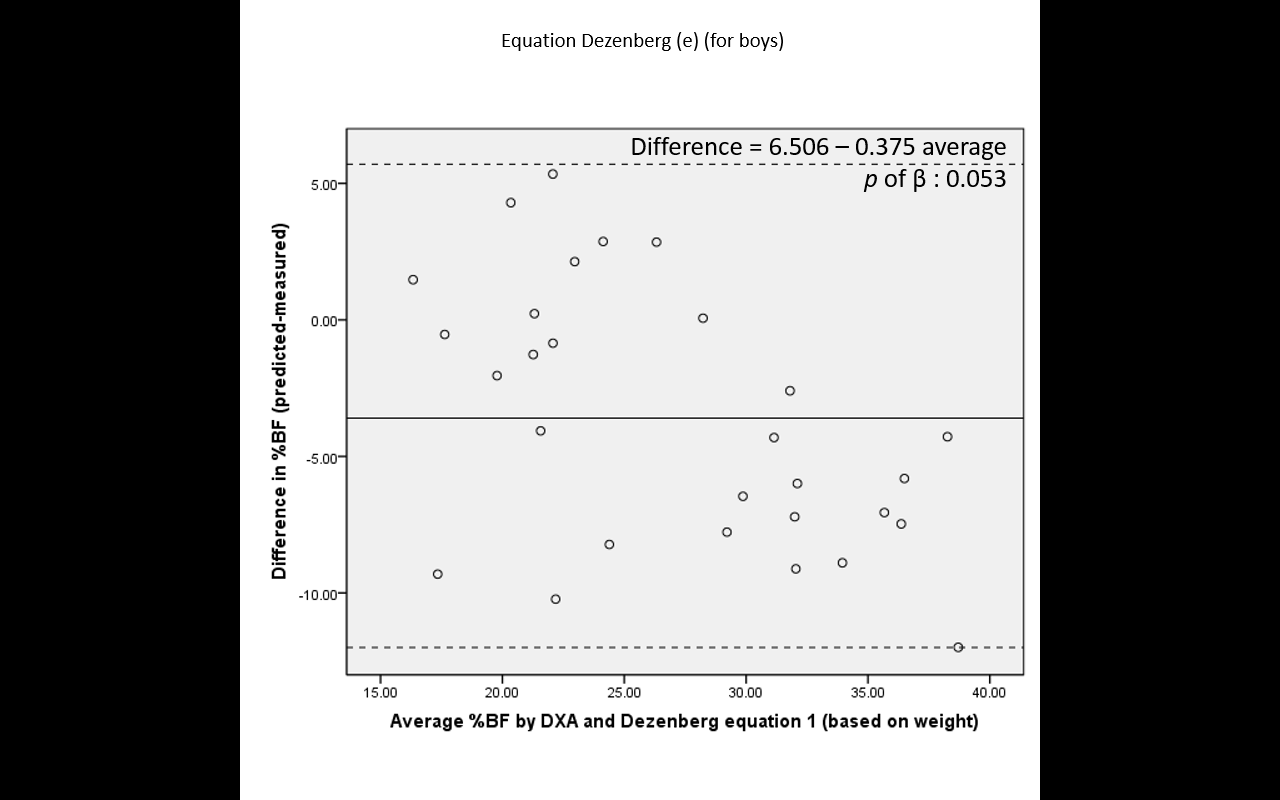 | 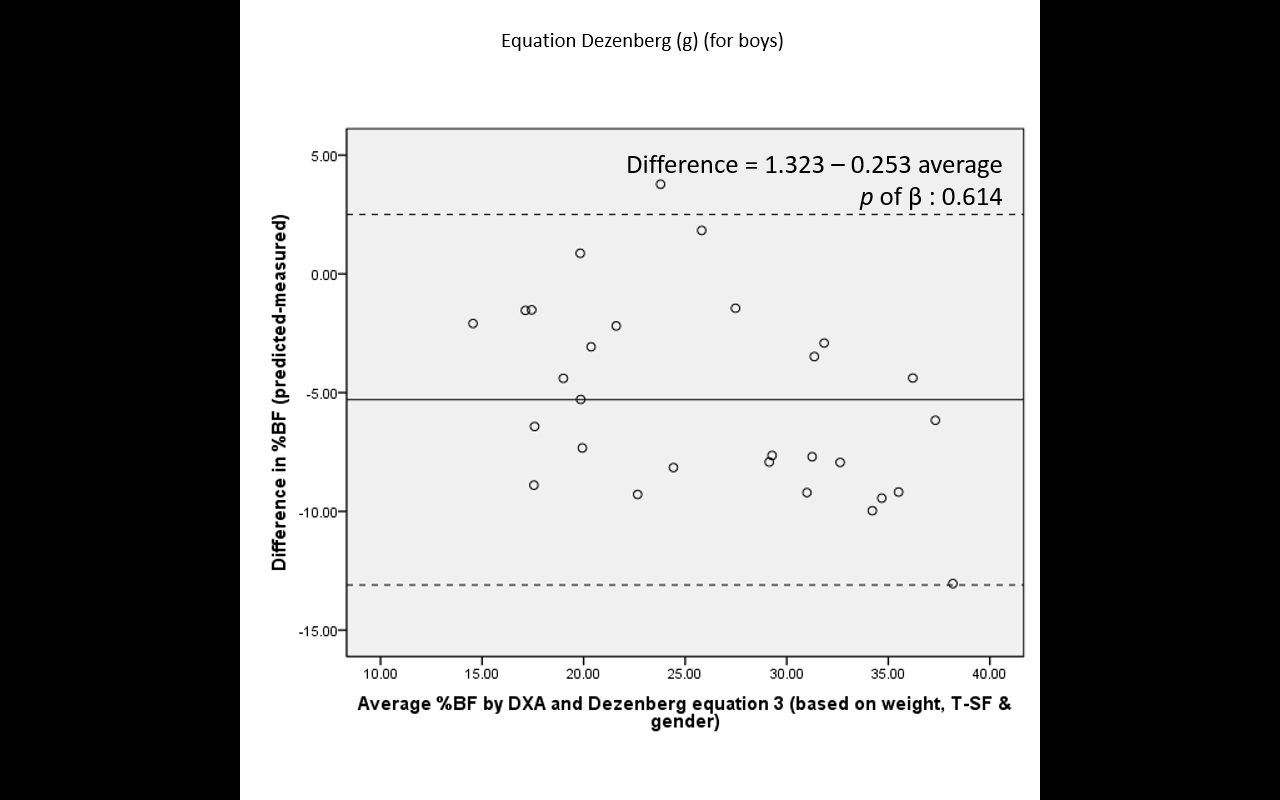 |
|  |  |
| B. Equação de Dezenberg para meninos | D. Equação de Dezenberg para meninos |
| 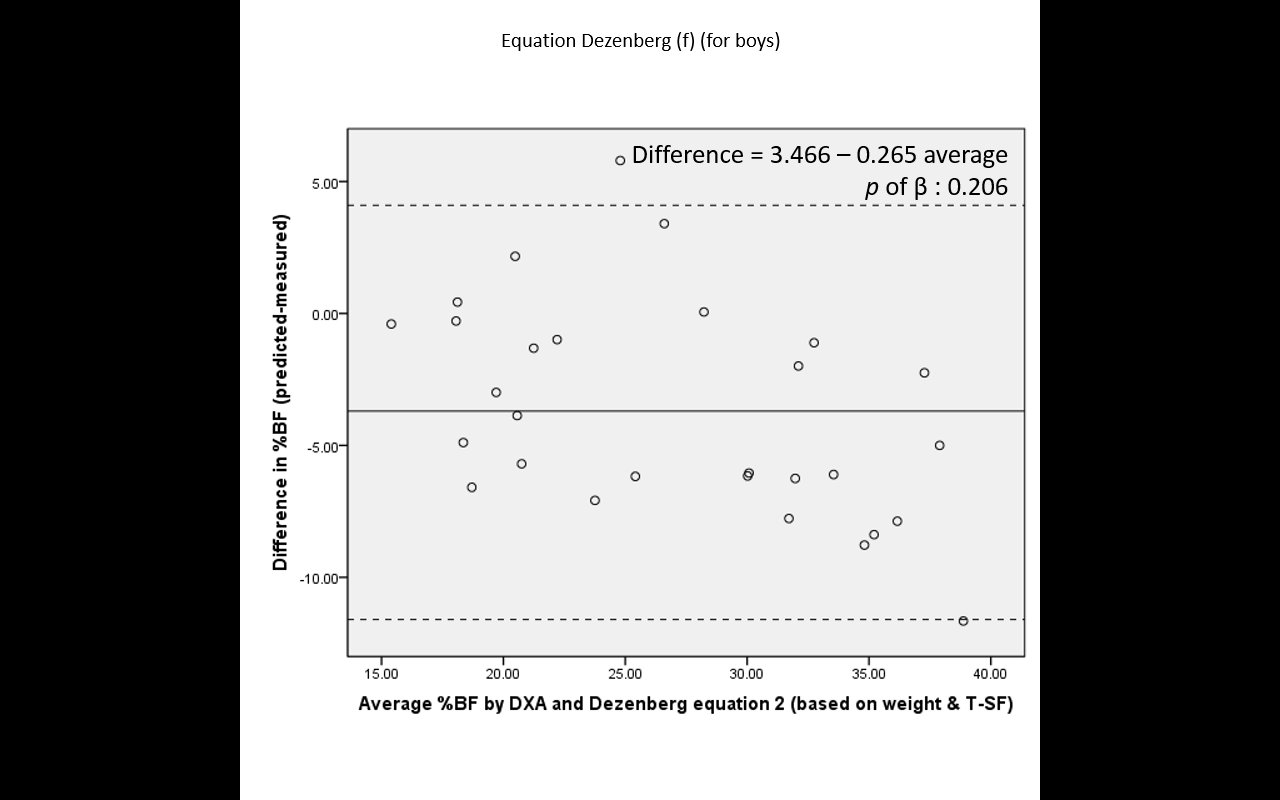 | 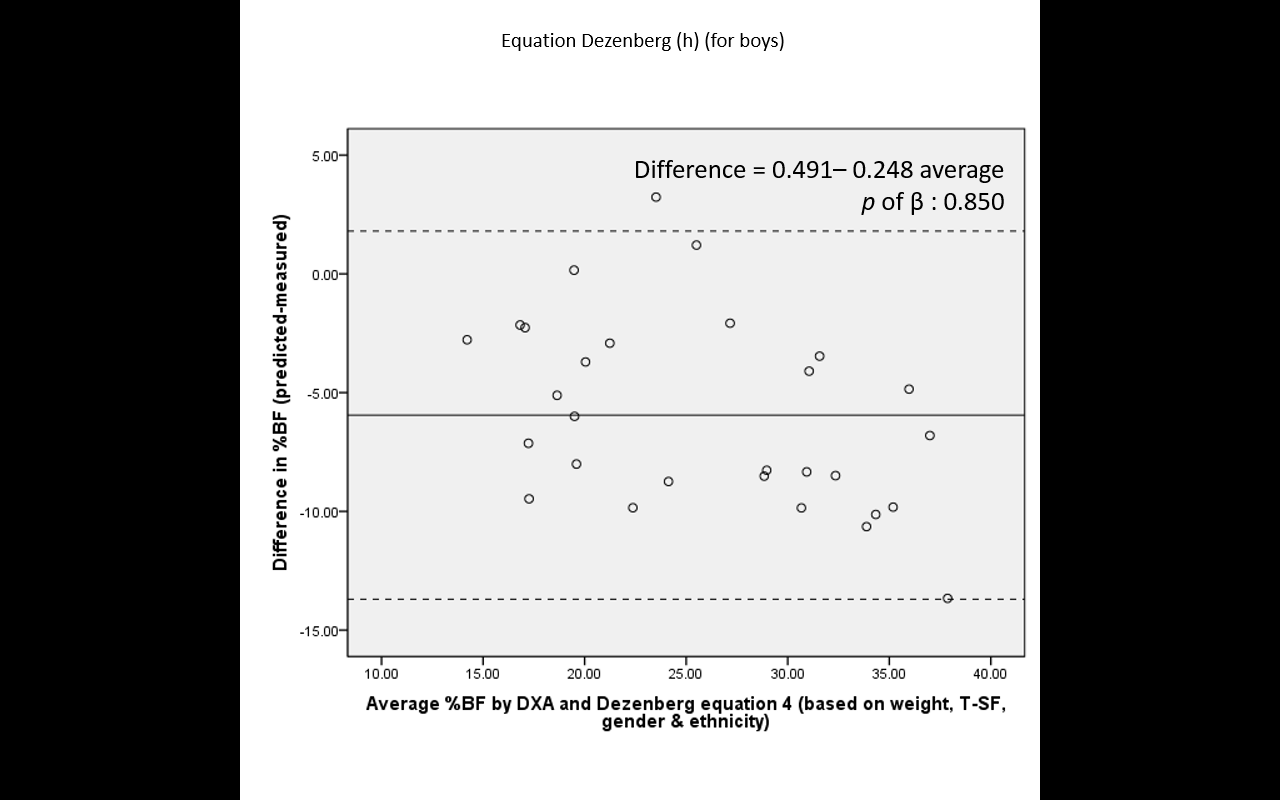 |

| E. Equação de Deurenberg para meninas. | F. Equação de Deurenberg para meninas |
| --- | --- |
| 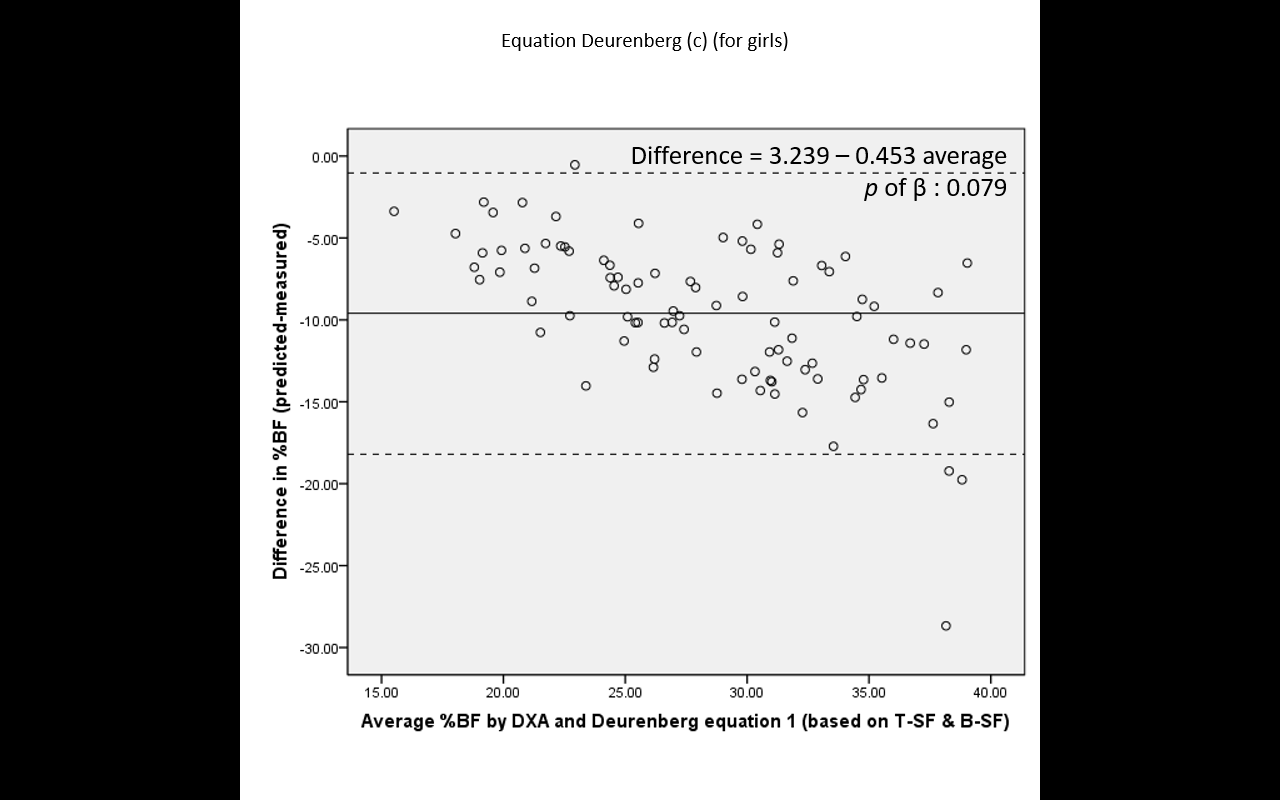 | 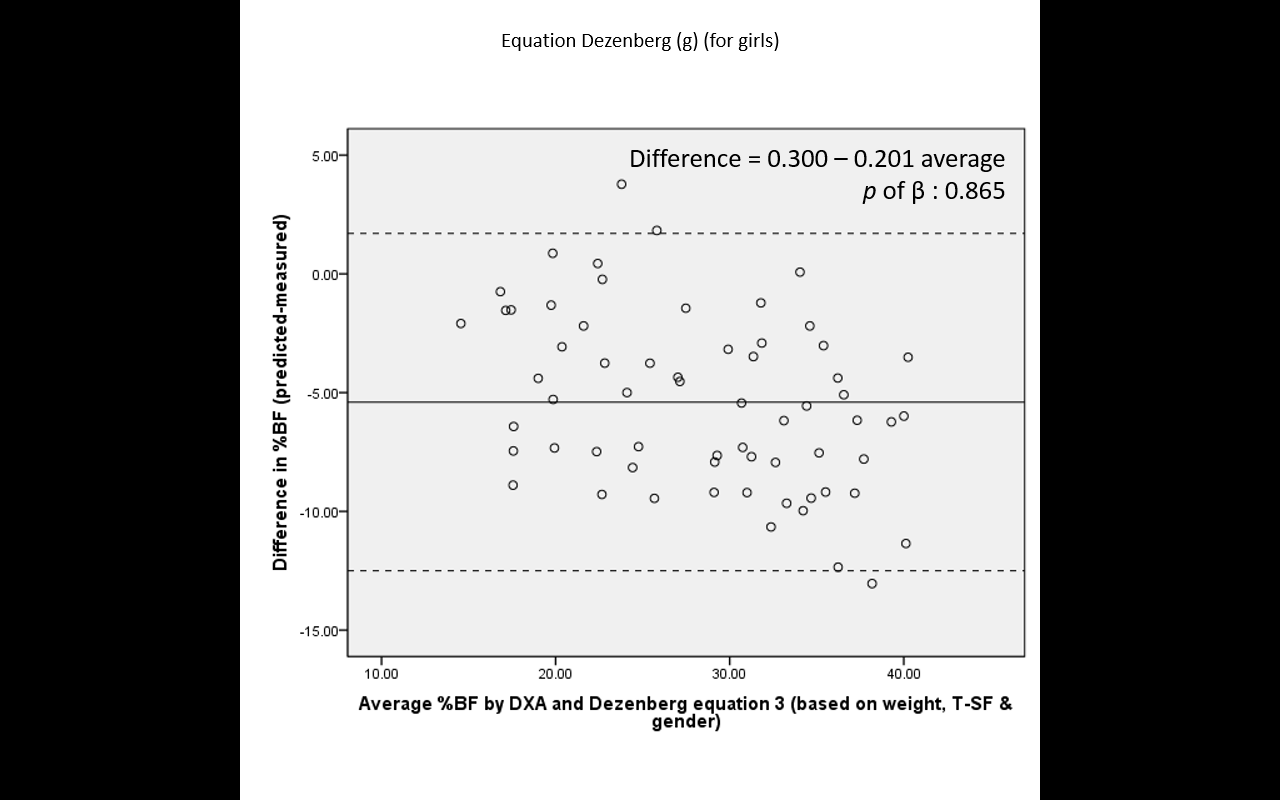 |

%GC pela DXA, percentual de gordura corporal estimada pela absorciometria de dupla energia de raios-X; T-SF, dobra cutânea do tríceps; B-SF, dobra cutânea do bíceps.
